# Supplementary material for: Syntheses, structures and characterization of noncentrosymmetric MZnPO4 (M = K, NH4)
Source: Royal Society of Chemistry journal article supplement (doi:10.1039/d4dt02530j), 2024-01-01
Supplement: d4dt02530j1.pdf [file d4dt02530j1.pdf]

## Supporting Information

### Syntheses, structures and characterization of noncentrosymmetric $MZnPO_4$ ( $M=$ **K, NH<sub>4</sub>**)

Jiawei Zhao,<sup>a</sup> Wei Wei,<sup>a</sup> Meihui Chen,<sup>a</sup> Yanna Chen<sup>\*a</sup> and Donghai An<sup>\*a,b</sup>

<sup>a</sup>Changji University, Changji 831100, China

<sup>b</sup>Xinjiang Technical Institute of Physics and Chemistry, Chinese Academy of Sciences, 40-1 South Beijing Road,  
Urumqi 830011, China.

\*Corresponding authors, E-mail: adhcjxy@163.com, ynchenaa@163.com

Table S1. Atomic coordinates ( $\times 10^4$ ) and equivalent isotropic displacement parameters ( $\text{\AA}^2 \times 10^3$ ) for  $\text{KZnPO}_4$ .  $U_{\text{eq}}$  is defined as one-third of the trace of the orthogonalized  $U_{ij}$  tensor.

| Atom  | x         | y         | z         | $U_{\text{eq}}$ | BVS   |
|-------|-----------|-----------|-----------|-----------------|-------|
| Zn(1) | -6737(2)  | -8415(3)  | -1936(3)  | 11.9(7)         | 2.225 |
| Zn(2) | -6666.67  | -3333.33  | -688(3)   | 5.7(9)          | 2.011 |
| K(1)  | -10000    | -10000    | 1091(9)   | 18.6(17)        | 0.819 |
| K(2)  | -5223(5)  | -4804(5)  | -3754(6)  | 10.2(8)         | 1.170 |
| P(1)  | -6666.67  | -3333.33  | -6717(11) | 6.5(16)         | 5.665 |
| P(2)  | -8309(9)  | -6727(5)  | -793(7)   | 16.1(12)        | 4.799 |
| O(1)  | -7199(19) | -5278(17) | -1370(18) | 15(2)           | 2.124 |
| O(2)  | -8324(18) | -8038(17) | -1600(20) | 20(2)           | 1.991 |
| O(3)  | -3333.33  | -6666.67  | -3470(30) | 25(4)           | 1.914 |
| O(4)  | -5142(18) | -3012(19) | -6020(20) | 16(3)           | 1.911 |
| O(5)  | -7760(17) | -6792(18) | 877(19)   | 21(3)           | 2.040 |
| O(6)  | -9700(19) | -6868(19) | -800(20)  | 29(3)           | 2.441 |

Table S2. Atomic coordinates ( $\times 10^4$ ) and equivalent isotropic displacement parameters ( $\text{\AA}^2 \times 10^3$ ) for  $\text{NH}_4\text{ZnPO}_4$ .  $U_{\text{eq}}$  is defined as one-third of the trace of the orthogonalized  $U_{ij}$  tensor.

| Atom  | x         | y        | z         | $U_{\text{eq}}$ | BVS   |
|-------|-----------|----------|-----------|-----------------|-------|
| N(1)  | 10320(60) | 5100(60) | 7590(80)  | 3(10)           | 5.001 |
| N(2)  | 10000     | 10000    | 7610(40)  | -32(7)          | 5.211 |
| Zn(1) | 8350(7)   | 6742(5)  | 9509(9)   | 15(3)           | 2.075 |
| Zn(2) | 6667      | 3333.01  | 5766(8)   | 3(3)            | 2.158 |
| P(1)  | 8304(19)  | 6728(17) | 5670(30)  | 22(5)           | 4.896 |
| P(2)  | 6667      | 3333.01  | 9760(40)  | 12(5)           | 4.971 |
| O(1)  | 10220(70) | 8160(90) | 9810(100) | 110(40)         | 1.752 |
| O(2)  | 7770(70)  | 6780(70) | 7340(60)  | 36(17)          | 1.747 |
| O(3)  | 6930(90)  | 7100(90) | 10670(70) | 80(20)          | 1.728 |
| O(4)  | 7810(80)  | 4940(80) | 10220(60) | 56(17)          | 1.737 |
| O(5)  | 7160(50)  | 5240(40) | 4980(50)  | 19(9)           | 1.735 |
| O(6)  | 6667      | 3333.01  | 7700(200) | 70(40)          | 1.939 |

Table S3. Selected bond distances (Å) and angles (degrees) for KZnPO<sub>4</sub>.

|                                             |           |                                            |           |
|---------------------------------------------|-----------|--------------------------------------------|-----------|
| Zn(1)-O(1) <sup>1</sup>                     | 1.937(16) | P(1)-K(1) <sup>3</sup>                     | 3.721(8)  |
| Zn(1)-O(1) <sup>2</sup>                     | 1.937(16) | P(1)-K(2)                                  | 3.721(6)  |
| Zn(1)-O(1)                                  | 1.937(16) | P(1)-O(4)                                  | 1.38(2)   |
| Zn(1)-O(2) <sup>3</sup>                     | 1.88(3)   | P(2)-O(2) <sup>9</sup>                     | 1.50(3)   |
| Zn(1)-K(1) <sup>4</sup>                     | 3.778(5)  | P(2)-O(5) <sup>2</sup>                     | 1.566(17) |
| Zn(1)-K(1) <sup>5</sup>                     | 3.778(5)  | P(2)-O(5) <sup>1</sup>                     | 1.566(17) |
| Zn(1)-K(1) <sup>3</sup>                     | 3.778(5)  | P(2)-O(5)                                  | 1.566(17) |
| Zn(1)-K(1) <sup>1</sup>                     | 3.712(6)  | P(2)-K(1) <sup>1</sup>                     | 3.647(8)  |
| Zn(1)-K(1) <sup>2</sup>                     | 3.712(6)  | P(2)-K(1) <sup>11</sup>                    | 3.819(6)  |
| Zn(1)-K(1)                                  | 3.712(6)  | P(2)-K(1) <sup>12</sup>                    | 3.819(6)  |
| Zn(2)-O(5) <sup>5</sup>                     | 1.935(18) | P(2)-K(1) <sup>9</sup>                     | 3.819(6)  |
| Zn(2)-O(3) <sup>6</sup>                     | 1.958(16) | P(2)-K(1)                                  | 3.647(8)  |
| Zn(2)-O(6)                                  | 1.910(17) | O(1)-K(1) <sup>2</sup>                     | 3.647(8)  |
| Zn(2)-K(1) <sup>7</sup>                     | 3.920(5)  | O(1)-K(1) <sup>5</sup>                     | 3.286(19) |
| Zn(2)-K(1) <sup>5</sup>                     | 3.995(6)  | O(1)-K(1)                                  | 2.699(16) |
| Zn(2)-K(1)                                  | 3.634(6)  | O(2)-K(1) <sup>8</sup>                     | 3.410(4)  |
| Zn(2)-K(1) <sup>8</sup>                     | 3.573(5)  | O(1)-K(1) <sup>13</sup>                    | 3.410(4)  |
| Zn(2)-K(2) <sup>9</sup>                     | 3.402(4)  | O(1)-K(1)                                  | 3.410(4)  |
| Zn(2)-K(2)                                  | 3.920(6)  | O(5)-K(1) <sup>2</sup>                     | 3.366(18) |
| Zn(2)-O(4) <sup>10</sup>                    | 2.044(17) | O(5)-K(1)                                  | 2.670(19) |
| P(1)-O(1)                                   | 1.486(16) | O(5)-K(1) <sup>12</sup>                    | 3.398(19) |
| P(1)-O(3)                                   | 1.548(18) | O(6)-K(2) <sup>9</sup>                     | 2.741(17) |
| P(1)-O(6)                                   | 1.533(17) | O(6)-K(2)                                  | 2.993(17) |
| P(1)-K(1)                                   | 3.786(9)  | K(1)-O(4) <sup>6</sup>                     | 2.80(2)   |
| P(1)-K(1) <sup>5</sup>                      | 3.647(9)  | K(1)-O(4) <sup>2</sup>                     | 3.300(19) |
| O(1) <sup>1</sup> -Zn(1)-O(1) <sup>2</sup>  | 111.2(4)  | O(1) <sup>12</sup> -K(1)-O(5) <sup>1</sup> | 101.9(5)  |
| O(1) <sup>1</sup> -Zn(1)-O(1)               | 111.2(4)  | O(1) <sup>12</sup> -K(1)-O(4) <sup>2</sup> | 104.6(4)  |
| O(1) <sup>2</sup> -Zn(1)-O(1)               | 111.2(4)  | O(1)-K(1)-O(4) <sup>2</sup>                | 74.9(5)   |
| O(2) <sup>5</sup> -Zn(1)-O(1)               | 107.7(5)  | O(1)-K(1)-O(4) <sup>6</sup>                | 103.2(5)  |
| O(2) <sup>5</sup> -Zn(1)-O(1) <sup>1</sup>  | 107.7(5)  | O(5)-K(5)-O(1) <sup>2</sup>                | 115.9(5)  |
| O(2) <sup>5</sup> -Zn(1)-O(1) <sup>2</sup>  | 107.7(5)  | O(5)-K(5)-O(1) <sup>12</sup>               | 74.1(5)   |
| O(6)-Zn(2)-O(3) <sup>6</sup>                | 108.6(7)  | O(5)-K(5)-O(2)                             | 128.8(6)  |
| O(6)-Zn(2)-O(4) <sup>10</sup>               | 109.6(7)  | O(5) <sup>4</sup> -K(5)-O(2)               | 43.7(5)   |
| O(5) <sup>4</sup> -Zn(2)-O(3) <sup>6</sup>  | 118.8(8)  | O(5) <sup>1</sup> -K(5)-O(2)               | 137.7(5)  |
| O(5) <sup>4</sup> -Zn(2)-O(4) <sup>10</sup> | 102.2(8)  | O(5)-K(5)-O(5) <sup>4</sup>                | 138.5(5)  |
| O(1)-K(1)-O(1) <sup>12</sup>                | 169.8(3)  | O(5) <sup>1</sup> -K(5)-O(5) <sup>4</sup>  | 138.5(5)  |
| O(1)-K(1)-O(2)                              | 115.3(6)  | O(5)-K(5)-O(5) <sup>1</sup>                | 47.8(6)   |
| O(1) <sup>12</sup> -K(1)-O(2)               | 54.8(5)   | O(5) <sup>1</sup> -K(5)-O(4) <sup>2</sup>  | 109.8(5)  |
| O(1)-K(1)-O(5) <sup>4</sup>                 | 71.8(5)   | O(5) <sup>1</sup> -K(5)-O(4) <sup>6</sup>  | 87.8(6)   |

|                                             |          |                                            |           |
|---------------------------------------------|----------|--------------------------------------------|-----------|
| O(1) <sup>12</sup> -K(1)-O(5) <sup>4</sup>  | 98.4(4)  | O(4) <sup>6</sup> -K(1)-O(1) <sup>12</sup> | 74.0(5)   |
| O(6) <sup>16</sup> -K(2)-O(6) <sup>17</sup> | 108.8(4) | O(6) <sup>5</sup> -K(2)-O(6) <sup>17</sup> | 108.8(4)  |
| O(6) <sup>8</sup> -K(2)-O(6) <sup>16</sup>  | 74.7(6)  | O(4) <sup>6</sup> -K(1)-O(4) <sup>2</sup>  | 161.5(4)  |
| O(6) <sup>17</sup> -K(2)-O(6)               | 67.5(5)  | O(1)-P(1)-O(3)                             | 102.5(10) |
| O(6) <sup>16</sup> -K(2)-O(6) <sup>10</sup> | 67.5(5)  | O(1)-P(1)-O(6)                             | 112.9(11) |
| O(6) <sup>5</sup> -K(2)-O(6) <sup>10</sup>  | 175.4(5) | O(6)-P(1)-O(3)                             | 102.3(9)  |
| O(6) <sup>5</sup> -K(2)-O(6) <sup>16</sup>  | 74.7(6)  | O(4)-P(1)-O(1)                             | 113.9(11) |
| O(6) <sup>8</sup> -K(2)-O(6) <sup>5</sup>   | 74.7(6)  | O(4)-P(1)-O(3)                             | 112.7(12) |
| O(6) <sup>8</sup> -K(2)-O(6) <sup>17</sup>  | 175.4(5) | O(4)-P(1)-O(6)                             | 111.5(10) |
| O(6) <sup>8</sup> -K(2)-O(6)                | 108.8(4) | O(5) <sup>9</sup> -P(2)-O(5) <sup>2</sup>  | 111.4(8)  |
| O(6) <sup>10</sup> -K(2)-O(6)               | 67.5(5)  | O(5) <sup>9</sup> -P(2)-O(5)               | 111.3(8)  |
| O(6) <sup>8</sup> -K(2)-O(6) <sup>10</sup>  | 108.8(4) | O(5) <sup>9</sup> -P(2)-O(5) <sup>1</sup>  | 111.4(8)  |
| O(6) <sup>16</sup> -K(2)-O(6)               | 175.4(5) | O(5) <sup>1</sup> -P(2)-O(5) <sup>1</sup>  | 107.5(9)  |
| O(6) <sup>5</sup> -K(2)-O(6)                | 108.8(4) | O(5) <sup>2</sup> -P(2)-O(5)               | 107.5(9)  |
| O(6) <sup>16</sup> -K(2)-O(6) <sup>10</sup> | 108.8(4) | O(5) <sup>2</sup> -P(2)-O(5) <sup>1</sup>  | 107.5(9)  |

Symmetry transformations used to generate equivalent atoms:

#1 -x+1,y-1/2,-z+3/2 #2 -x+1,y+1/2,-z+3/2

#3 x,-y+1/2,z-1/2 #4 -x,y-1/2,-z+3/2

#5 -x+1,-y,-z+1 #6 x,y-1,z #7 x,-y-1/2,z-1/2

#8 x,-y-1/2,z+1/2 #9 x,y+1,z #10 -x,y+1/2,-z+3/2

#11 x,-y+1/2,z+1/2

Table S4. Selected bond distances (Å) and angles (degrees) for NH<sub>4</sub>ZnPO<sub>4</sub>.

|                 |            |                |            |
|-----------------|------------|----------------|------------|
| Zn(1)-O(1)      | 1.9406(9)  | P(1)-O(3)      | 1.5423(9)  |
| Zn(1)-O(2)      | 1.9493(8)  | P(2)-O(6)      | 1.5081(13) |
| Zn(1)-O(3)      | 1.9577(9)  | P(2)-O(4)      | 1.5465(8)  |
| Zn(1)-O(4)      | 1.9398(8)  | N(1)-H(1)      | 0.83(3)    |
| Zn(2)-O(5)      | 1.9455(8)  | N(1)-H(2)      | 0.84(3)    |
| Zn(2)-O(6)      | 1.8953(12) | N(1)-H(3)      | 0.864(17)  |
| P(1)-O(2)       | 1.5398(8)  | N(1)-H(4)      | 0.89(2)    |
| P(1)-O(5)       | 1.5452(8)  | N(2)-H(5)      | 0.94(3)    |
| P(1)-O(3)       | 1.5423(12) | N(2)-H(6)      | 0.85(2)    |
| O(1)-Zn(1)-O(2) | 106.26(3)  | O(1)-P(1)-O(5) | 109.29(5)  |
| O(1)-Zn(1)-O(3) | 112.19(3)  | O(1)-P(1)-O(3) | 108.40(4)  |
| O(1)-Zn(1)-O(4) | 113.90(3)  | O(4)-P(2)-O(6) | 111.10(3)  |
| O(2)-Zn(1)-O(3) | 105.70(3)  | O(4)-P(2)-O(4) | 107.79(5)  |
| O(2)-Zn(1)-O(4) | 115.82(3)  | H(1)-N(1)-H(2) | 114(3)     |
| O(3)-Zn(1)-O(4) | 102.78(3)  | H(1)-N(1)-H(3) | 109.3(18)  |
| O(5)-Zn(2)-O(6) | 108.92(2)  | H(1)-N(1)-H(4) | 112(2)     |
| O(5)-Zn(2)-O(5) | 110.02(4)  | H(2)-N(1)-H(3) | 103.0(18)  |
| O(2)-P(1)-O(5)  | 109.40(4)  | H(2)-N(1)-H(4) | 109(2)     |
| O(2)-P(1)-O(3)  | 109.71(4)  | H(3)-N(1)-H(4) | 109.0(19)  |
| O(1)-P(1)-O(2)  | 109.75(4)  | H(5)-N(2)-H(6) | 113.8(13)  |
| O(3)-P(1)-O(5)  | 110.26(4)  |                |            |

Symmetry transformations used to generate equivalent atoms:

- #1  $x, -y+1/2, z+1/2$  #2  $-x+2, y+1/2, -z+3/2$   
 #3  $-x+2, y-1/2, -z+3/2$  #4  $-x+1, -y, -z+2$   
 #5  $-x+2, -y, -z+2$  #6  $x, y+1, z$  #7  $x, -y-1/2, z-1/2$   
 #8  $x, -y+1/2, z-1/2$  #9  $x, -y-1/2, z+1/2$   
 #10  $-x+2, -y, -z+1$  #11  $x, y-1, z$

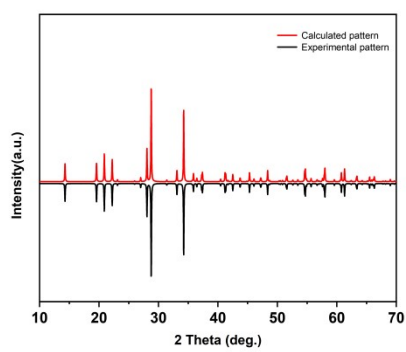

(a)

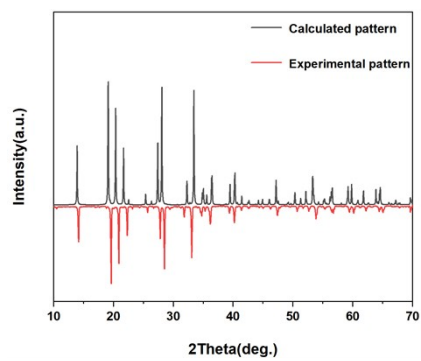

(b)

**Figure S1.** Powder XRD patterns of (a) KZnPO<sub>4</sub> and (b) NH<sub>4</sub>ZnPO<sub>4</sub>.

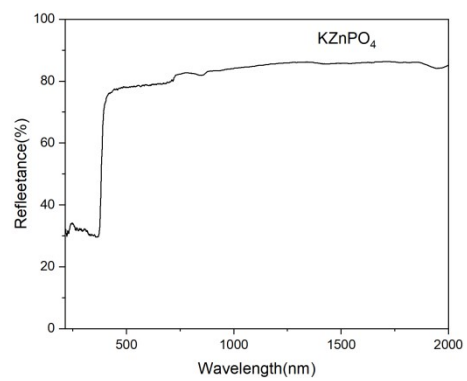

(a)

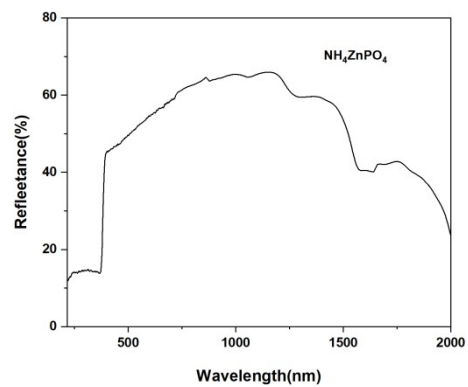

(b)

**Figure S2.** UV-vis-NIR diffuse reflectance spectra of (a)  $\text{KZnPO}_4$  and (b)  $\text{NH}_4\text{ZnPO}_4$ .



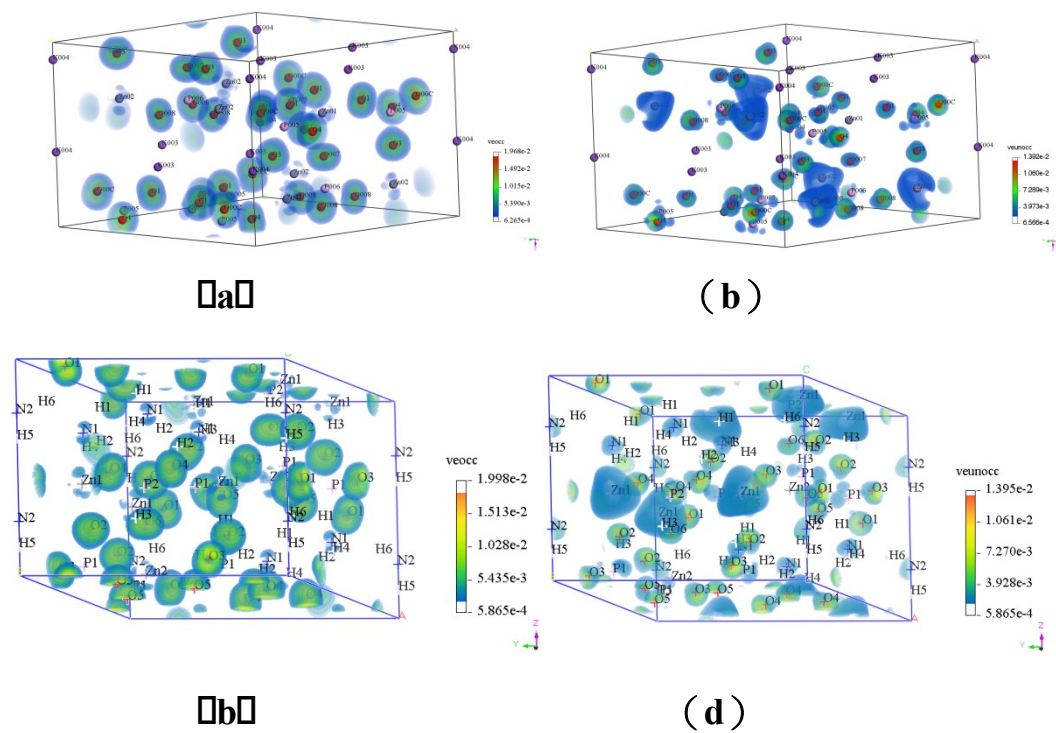

**Figure S3.** Virtual electron (VE) (a) occupied, and virtual electron (VE) (b) unoccupied orbitals of KZnPO<sub>4</sub>; Virtual electron (VE) (c) occupied, and virtual electron (VE) (d) unoccupied orbitals of NH<sub>4</sub>ZnPO<sub>4</sub>.
